# Supplementary material for: A single fluorescent probe for imaging ribonucleic acid and sulfur dioxide in living systems and its unique application in tumor and normal cells
Source: Royal Society of Chemistry journal article supplement (doi:10.1039/c8tb02144a), 2018-01-01
Supplement: c8tb02144a1.pdf [file c8tb02144a1.pdf]

## *Supporting Information*

**A single fluorescent probe for imaging ribonucleic acid and sulfur dioxide in living systems and unique application in tumor and normal animals†**

Weishan Wang, Yong Liu, Jie Niu, and Weiyong Lin \*

Institute of Fluorescent Probes for Biological Imaging, School of Materials Science and Engineering, School of Chemistry and Chemical Engineering, University of Jinan, Shandong 250022, P.R. China.

\*E-mail: [weiyonglin2013@163.com](mailto:weiyonglin2013@163.com)

## Table of content

1. Synthesis
2. Calculation of RNA /DNA concentration
3. Fig. S1
4. Table S1
5. Fig. S2
6. Fig. S3
7. Fig. S4
8. Fig. S5
9. Fig. S6
10. Fig. S7
11. Table. S2
12. Fig. S8
13. Fig. S9
14. Characterization

## 1. Synthesis

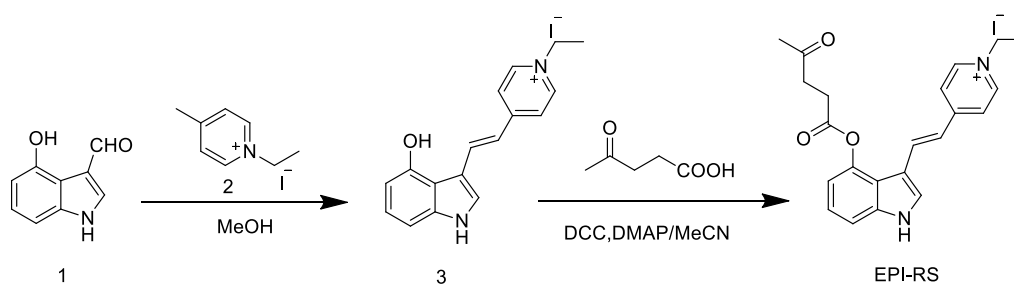

**Scheme. S1.** The synthetic route to the probe **EPI-RS**.

## 2. Calculation of RNA /DNA concentration

RNA/DNA concentration was calculated by follow equation. The ultraviolet absorption intensity stranded for size of the electron energy level transition probability, and abides by the lambert beer's law (1).

$$A = -\log \frac{I}{I_0} = \varepsilon cl \quad (1)$$

A stand for absorbance;  $\varepsilon$  stand for extinction coefficient, extinction coefficient of RNA is 7700 (DNA is 6600);  $c$  stand for molar concentration;  $l$  stand for length of sample pool;  $I_0$  and  $I$  stand for intensity of the incident light and transmission light, respectively.

## 3. Fig.S1

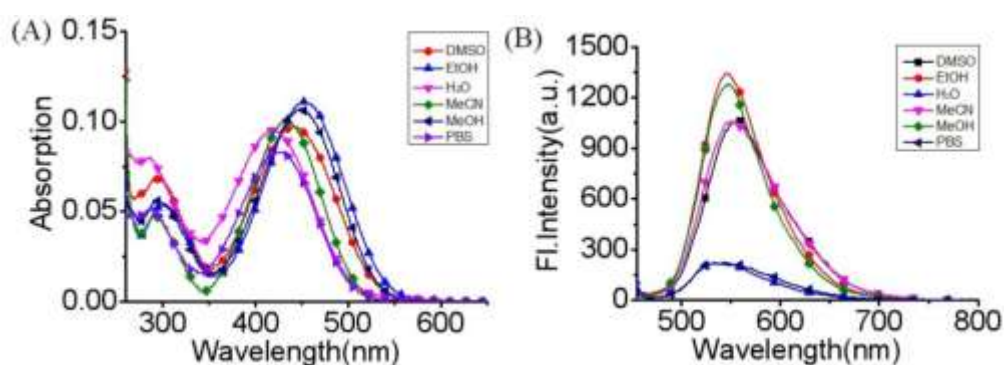

**Fig. S1** (A) Absorption spectra and (B) fluorescence responses of **EPI-RS** in various solvents. [**EPI-RS**]: 10  $\mu$ M.

#### 4. Table S1

**Table S1** The photophysical properties of **EPI-RS** in various solvents.

| Solvents         | $\lambda^a / \lambda^b$ (nm) | Stokes shifts | $^c\Phi$ |
|------------------|------------------------------|---------------|----------|
| DMSO             | 442/560                      | 118           | 13.3     |
| EtOH             | 453/545                      | 93            | 13.7     |
| H <sub>2</sub> O | 417/534                      | 117           | 3.2      |
| MeCN             | 434/550                      | 116           | 13.5     |
| MeOH             | 448/548                      | 100           | 12.9     |
| PBS              | 424/554                      | 120           | 0.2374   |

<sup>a</sup>Maximum absorption wavelength (nm). <sup>b</sup>Maximum emission wavelength (nm). <sup>c</sup> $\Phi$  is fluorescence quantum yield (error limit: 8%) determined by using Rhodamine 6G ( $\Phi=0.95$ ) in Water as the standard.

#### 5. Fig. S2

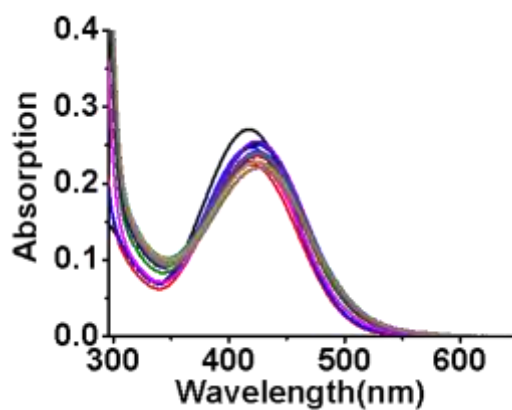

**Fig. S2** Absorption spectra and of **EPI-RS** with the addition of RNA (0–4000 equiv.) in PBS buffer solution. [EPI-RS]:  $1.5 \times 10^{-4}$   $\mu$ M.

6. Fig. S3

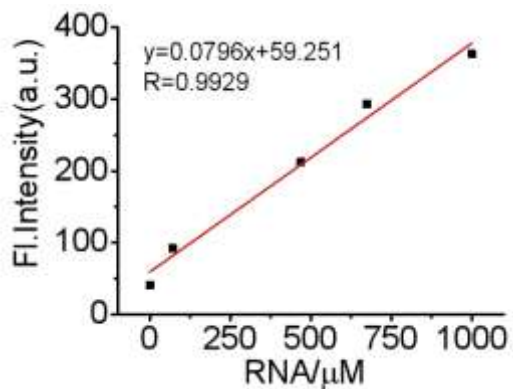

Fig. S3 The limit of detection for RNA.

7. Fig. S4

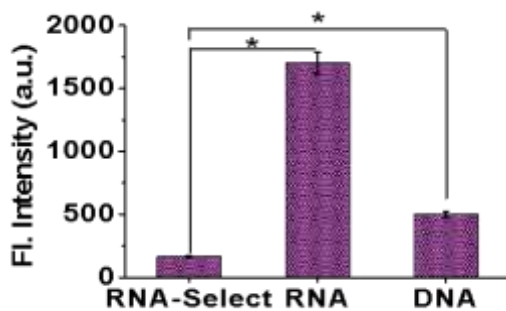

Fig. S4 Fluorescence responses of commercial probes “RNA-Select” (2 μM) in the presence of RNA and DNA. RNA and DNA concentration: 155 mg/mL.

8. Fig. S5

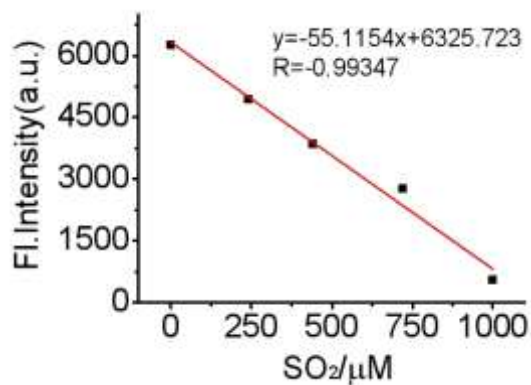

Fig. S5 The limit of detection for SO<sub>2</sub>.

9. Fig. S6

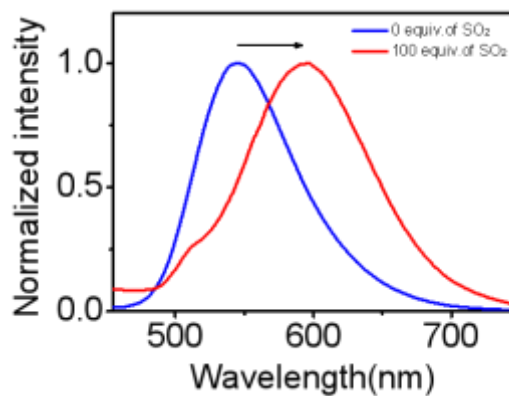

**Fig. S6** Fluorescence spectra of EPI-RS (10  $\mu$ M) in pH 7.4 PBS buffer solution with the addition of Na<sub>2</sub>SO<sub>3</sub>.

10. Fig. S7

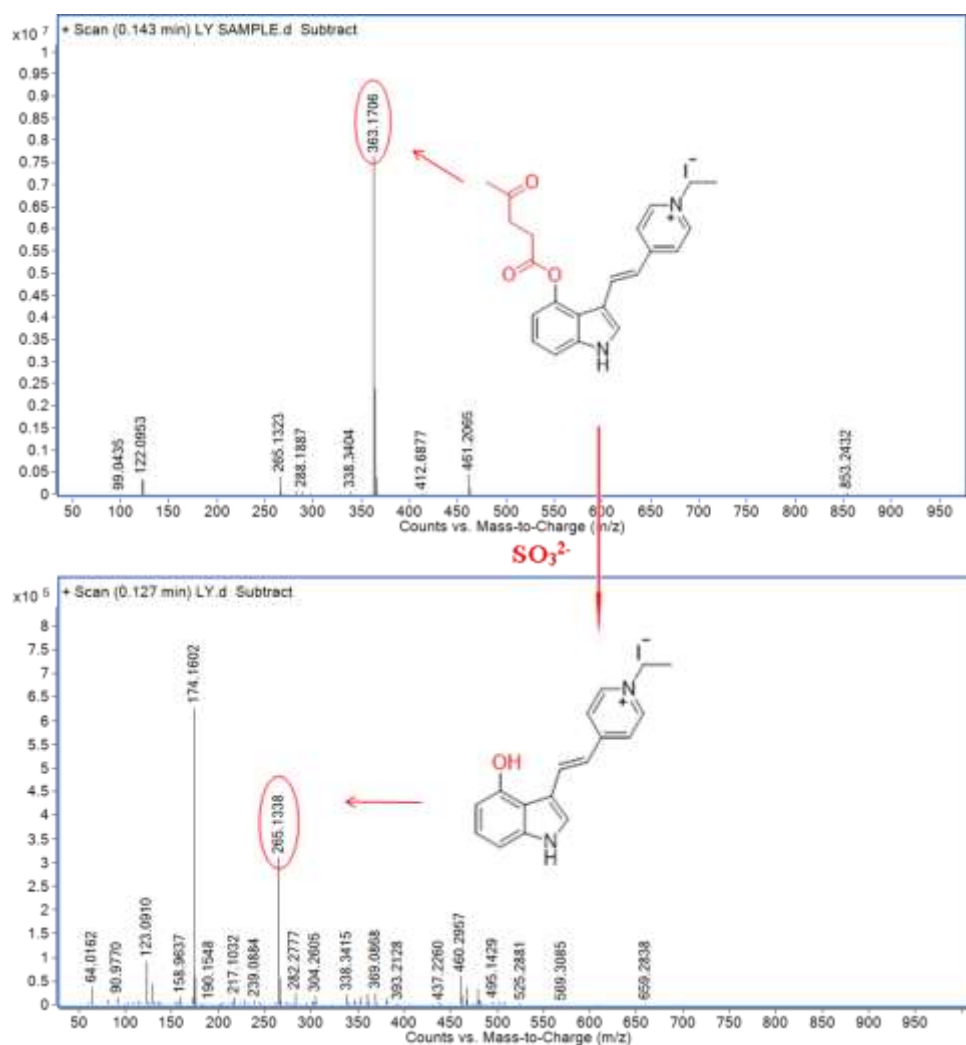

**Fig. S7** HRMS spectrum of EPI-RS and **Compound 3**.

**11. Table S2** Cytotoxicity Data of **EPI-RS** in 3T-3 cells <sup>a</sup>.

| Incubate concentration( $\mu$ M) | 0           | 1          | 5          | 10         | 20         | 30         |
|----------------------------------|-------------|------------|------------|------------|------------|------------|
| (% cell survival)                | 100 $\pm$ 4 | 99 $\pm$ 4 | 92 $\pm$ 4 | 91 $\pm$ 4 | 86 $\pm$ 4 | 83 $\pm$ 4 |

<sup>a</sup> Cell viability was quantified by the MTT assays (mean  $\pm$  SD).

**12. Fig. S8**

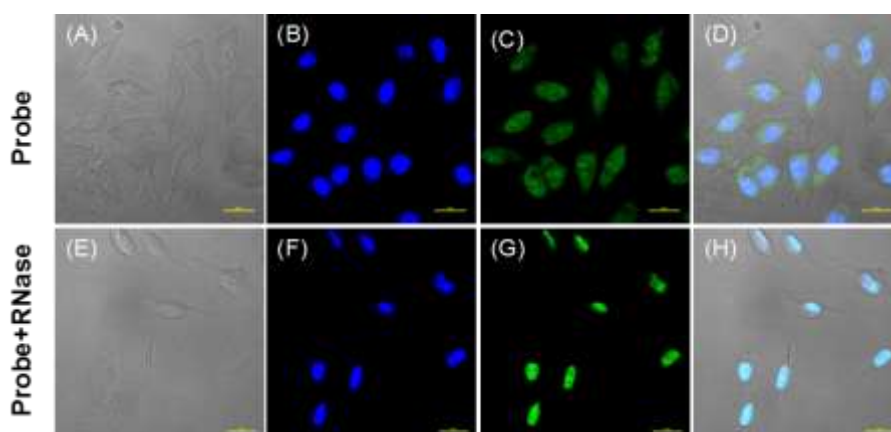

**Fig. 8** (A) and (D): Bright-field images. (B) and (F): Fluorescence imaging of cells stained with DAPI (20  $\mu$ g/mL). (C): Images of 3T-3 cells treated with  $1.0 \times 10^{-5}$  M **EPI-RS**; (G): Images of 3T-3 cells treated with  $1.0 \times 10^{-5}$  M **EPI-RS** and 20  $\mu$ g/mL DNase-Free RNase (GE); (D and H): Merged pictures.

13. Fig. S9

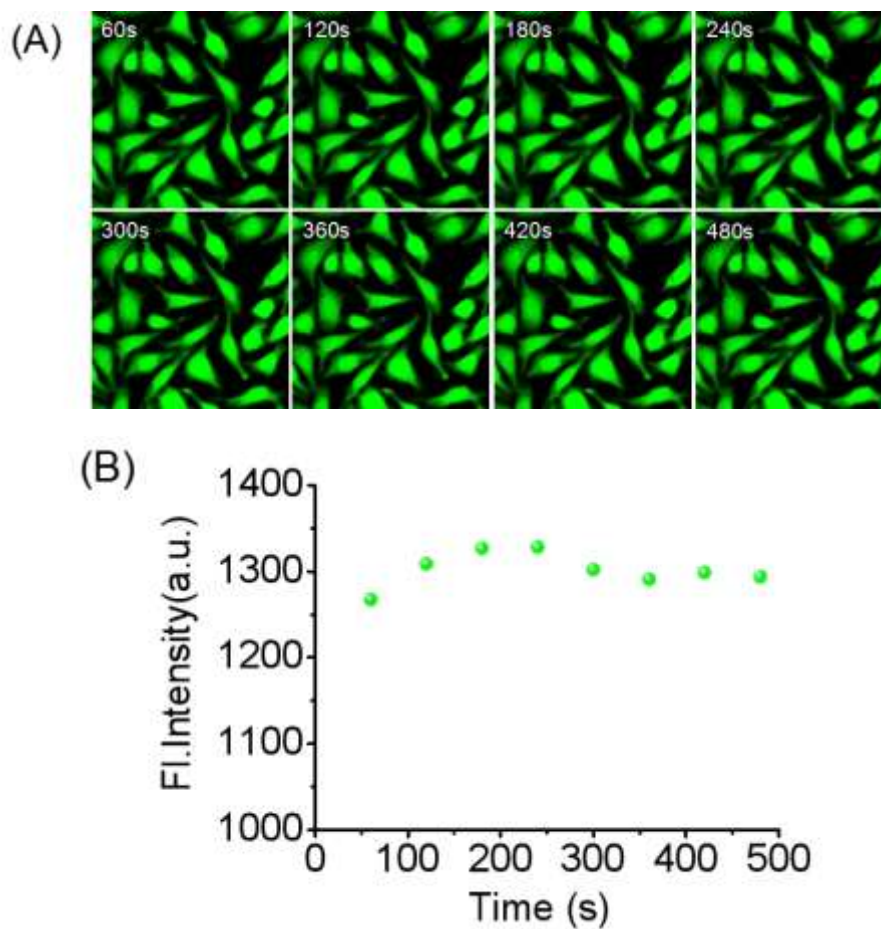

**Fig. S9.** (A) Fluorescence images (the green channel) of 3T-3 cells incubated with were incubated with **EPI-RS** (10  $\mu$ M) acquired at different times under successive excitation. (B) Mean intensities of the cells incubated in the green channel under successive excitation at different times. Images were acquired from 500 to 550 nm for green fluorescence.  $\lambda_{ex}$  = 405 nm. Scale bar = 20  $\mu$ m.



## 14. Characterization

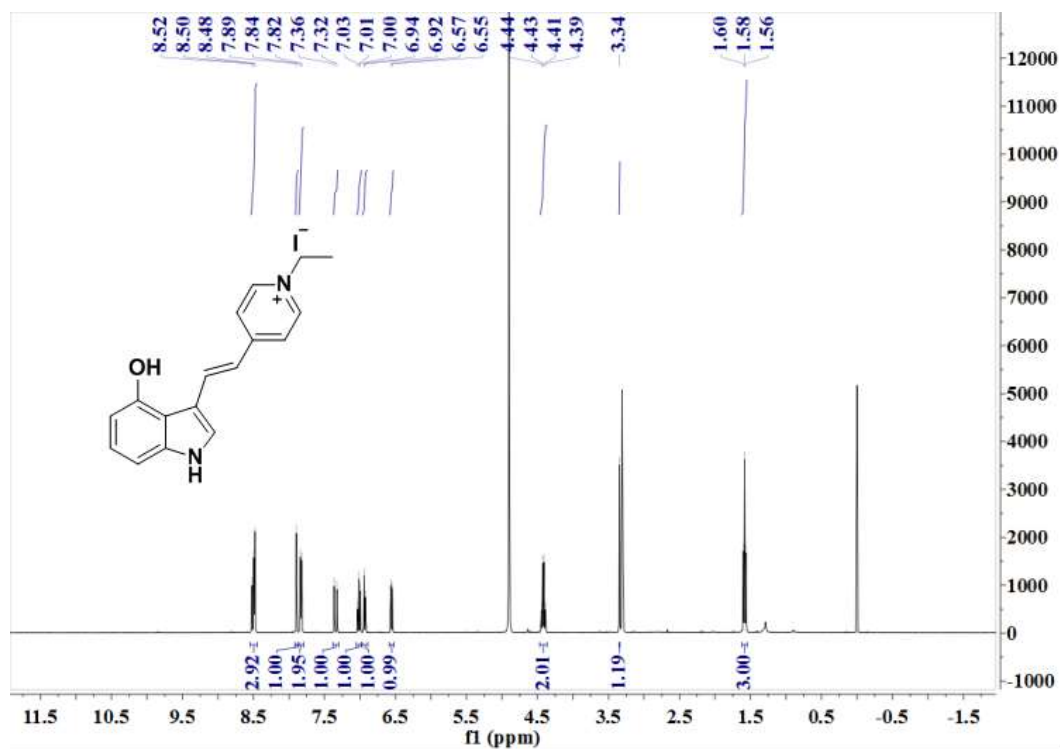

**Fig. S10**  $^1\text{H}$  NMR spectrum of compound 3

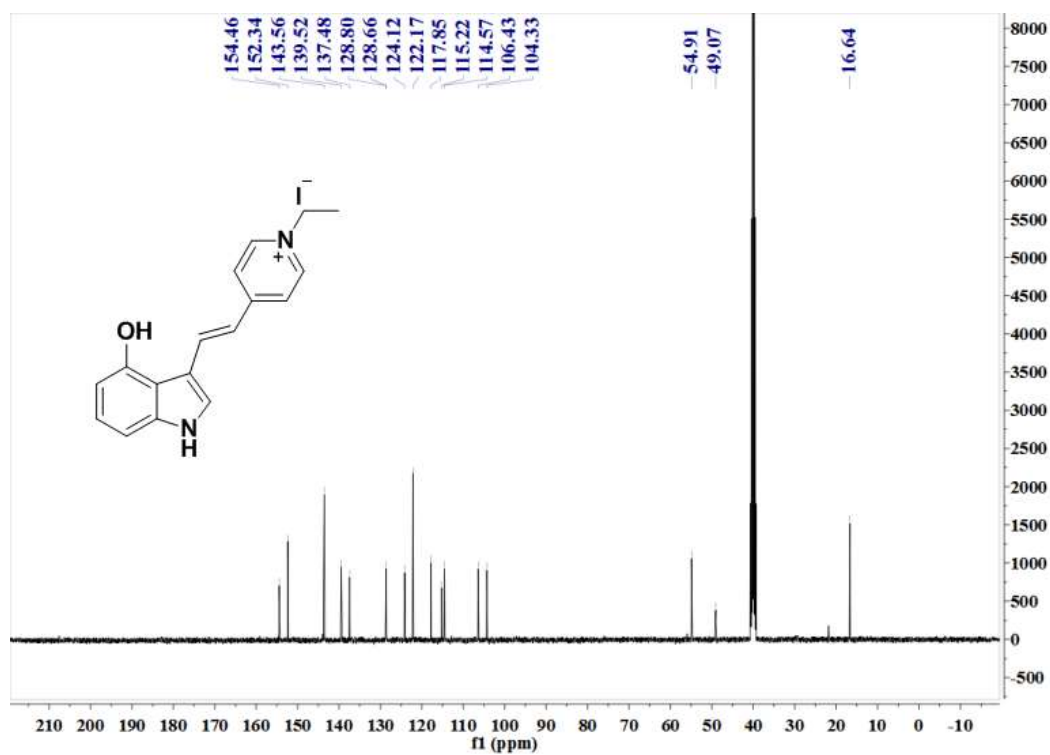

**Fig. S11**  $^{13}\text{C}$  NMR spectrum of compound 3

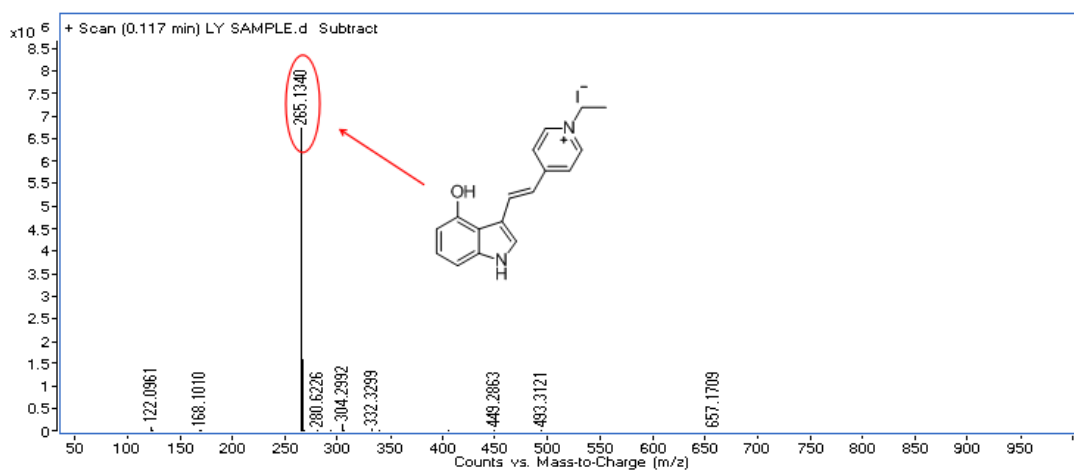

Fig. S12 HRMS spectrum of **compound3**

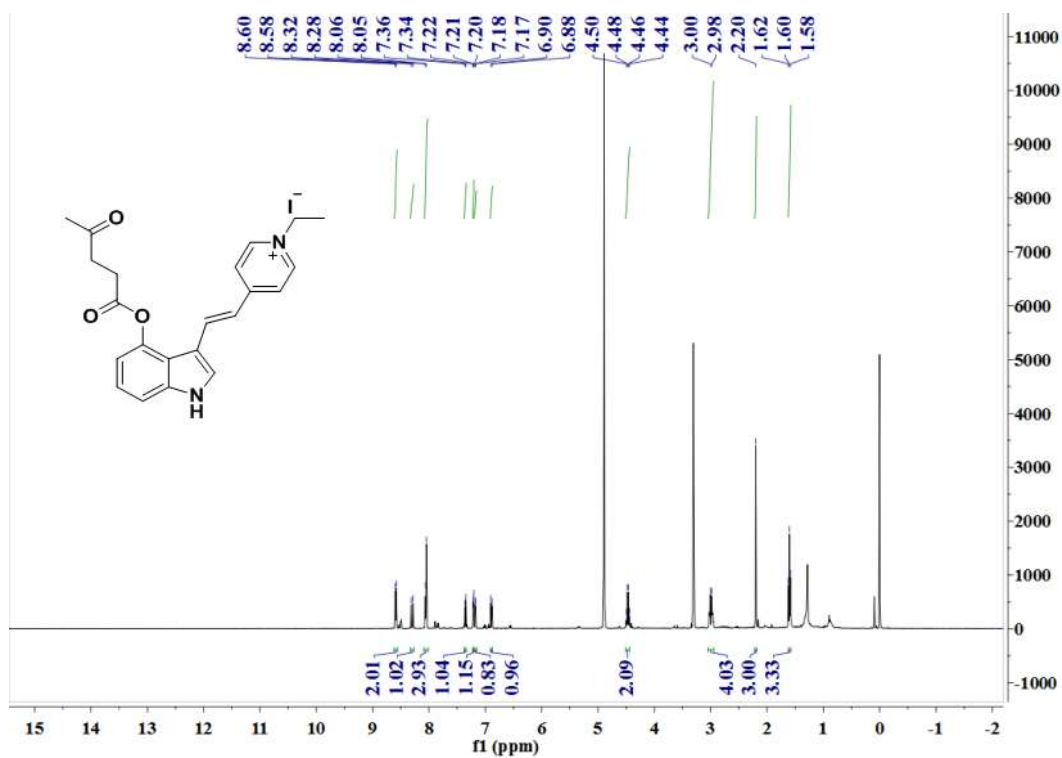

Fig. S13 <sup>1</sup>H NMR spectrum of **EPI-RS**

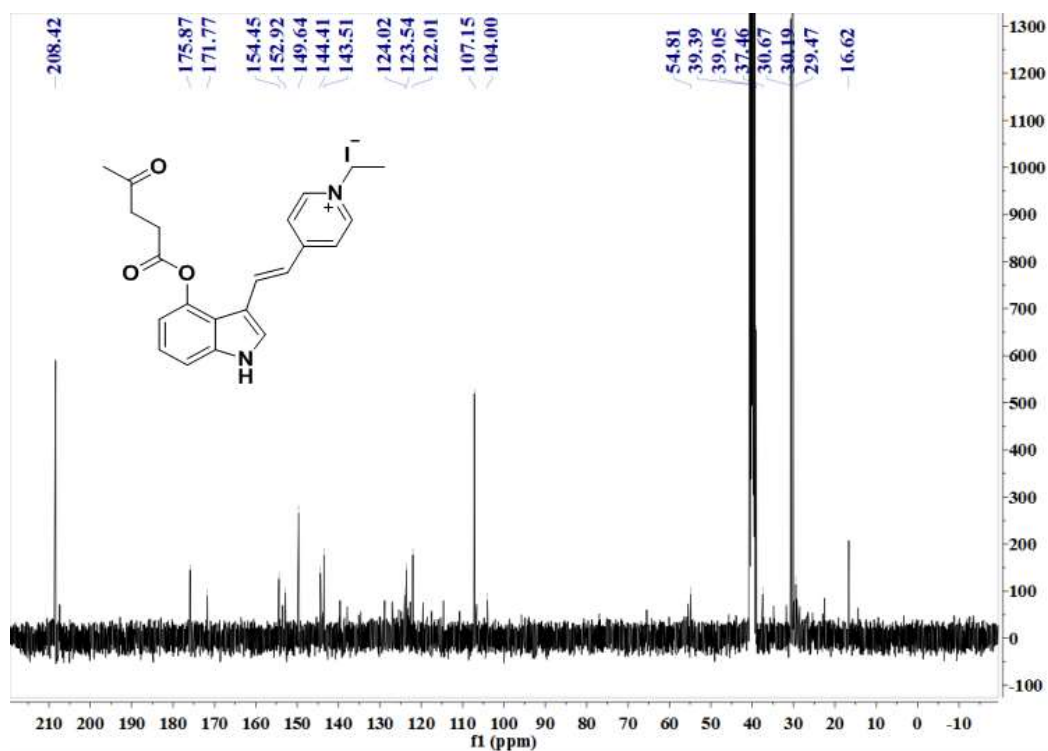

Fig. S14  $^{13}\text{C}$  NMR spectrum of EPI-RS

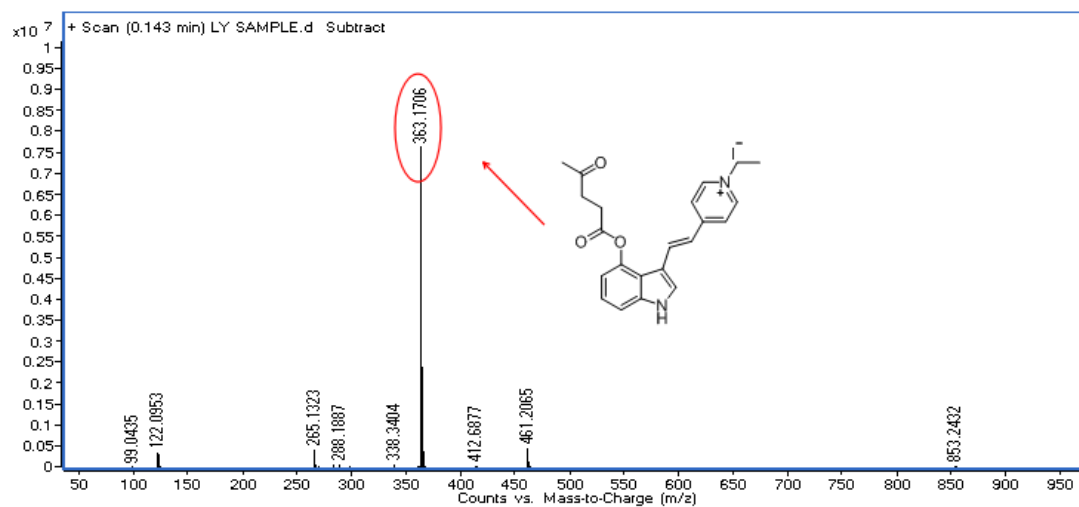

Fig. S15 HRMS spectrum of EPI-RS
